# Supplementary material for: Hypoxia drives murine neutrophil protein scavenging to maintain central carbon metabolism
Source: JCI journal article supplement (doi:10.1172/jci134073), 2021-04-06
Supplement: sd1 [file 1]

**Figure S1**

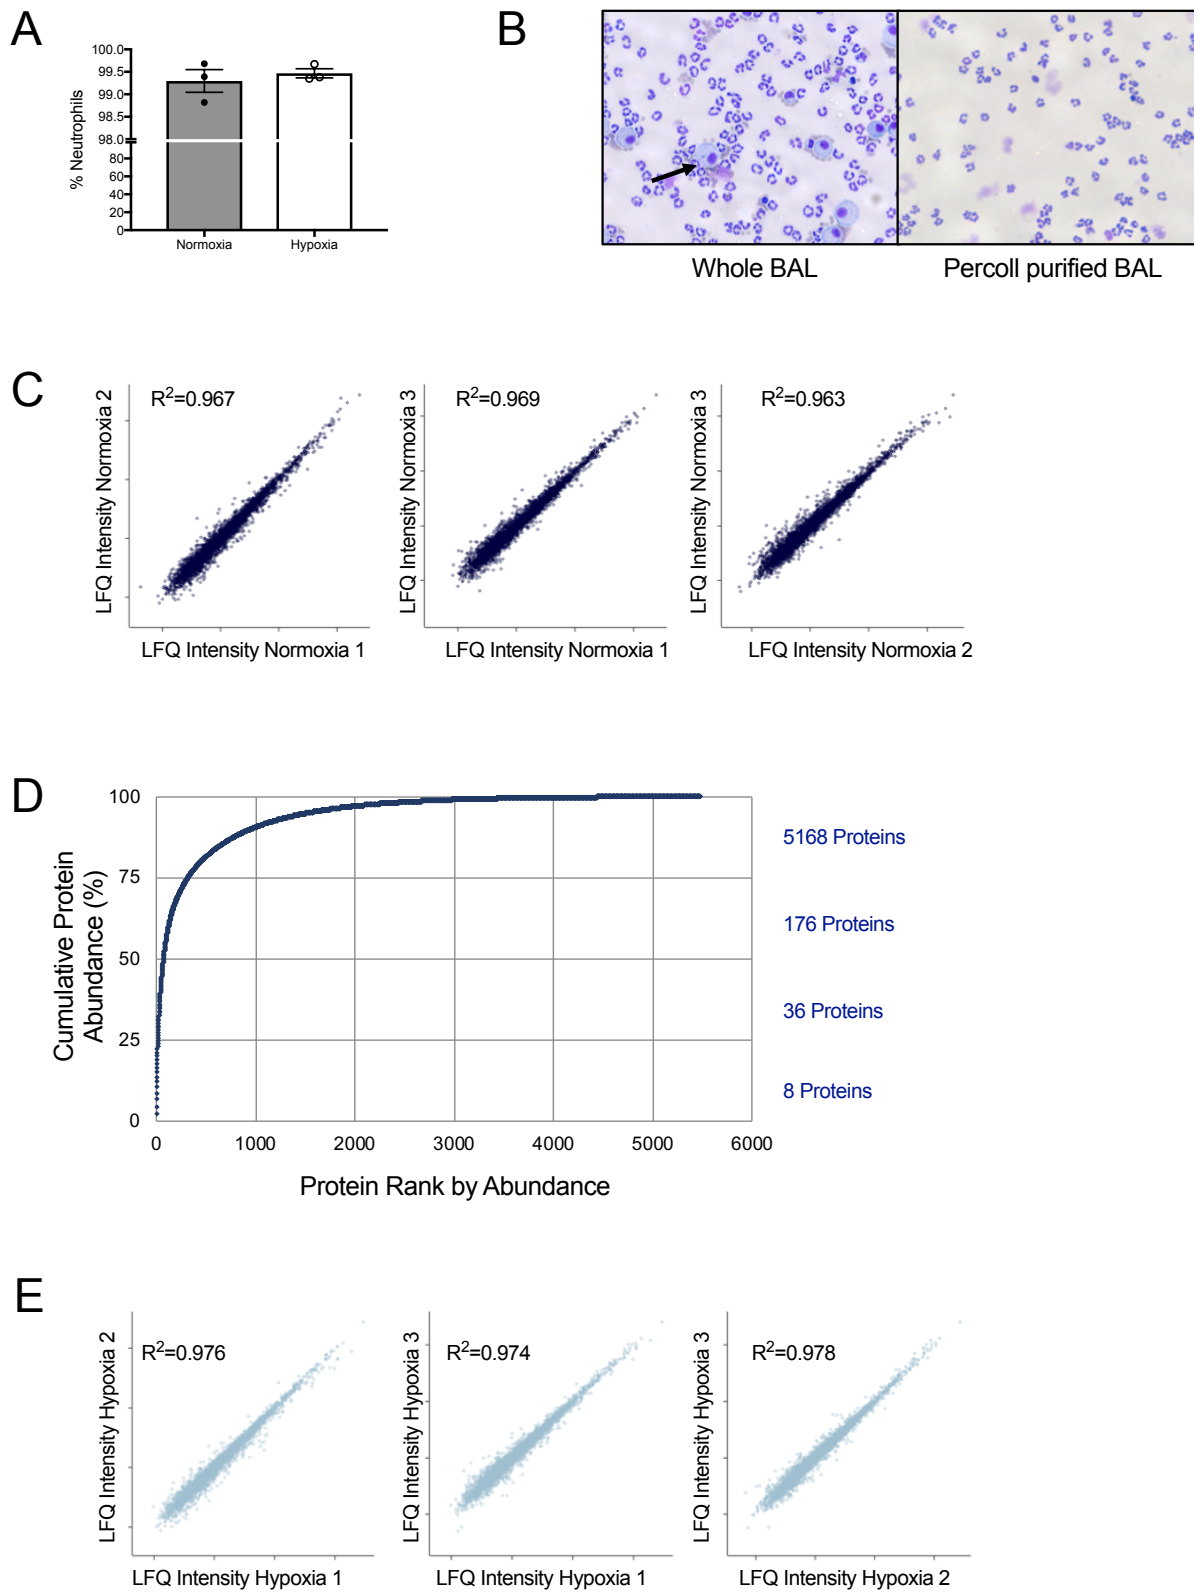

**Figure S1:**

(A) BAL neutrophils isolated 24 hours post- nebulised LPS from normoxic or hypoxic mice were purified by Percoll gradient to generate samples of >98.8% purity (n=3 per condition).

(B) Representative cytopsin of BAL cells with contaminating alveolar macrophages seen

- 5 prior to purification (black arrow). Correlation of LFQ intensity for three biological replicates from normoxic (C) and hypoxic (E) samples, with  $R^2$  value shown for each comparison. (D) The contribution of each protein to the total protein mass was calculated using the copy number and molecular mass for each of the identified proteins, the number of proteins accounting for percentage of total protein mass is shown for each condition.

**Figure S2**

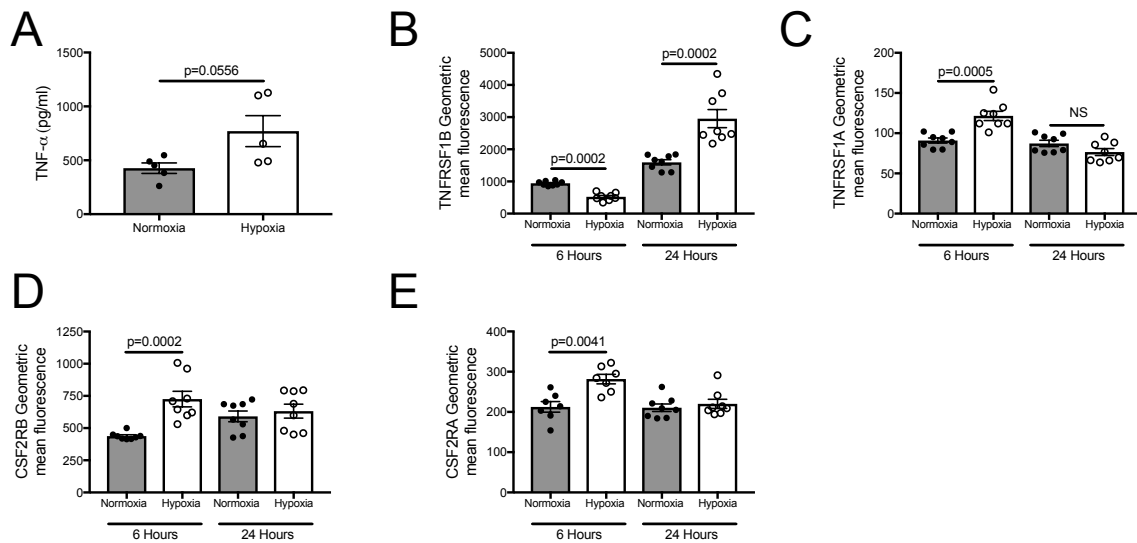

**Figure S2:**

(A) BAL supernatant TNF- $\alpha$  concentration measured by multiplex cytokine assay, (n=5 over  
 5 two experiments). Flow cytometric analysis of surface expression of (B) TNFRSF1B and (C)  
 TNFRSF1A on BAL neutrophils from normoxic and hypoxic mice, 6 and 24 hours post-LPS  
 (n=8 over two experiments). Surface expression of (D) CSF2RB and (E) CSF2RA on BAL  
 neutrophils, from normoxic and hypoxic mice, 6 and 24 hours post-nebulised LPS, n=7-8  
 over three experiments. All data analysed by Mann-Whitney test of significance and  
 10 represents individual values and mean  $\pm$  SEM.

**Figure S3**

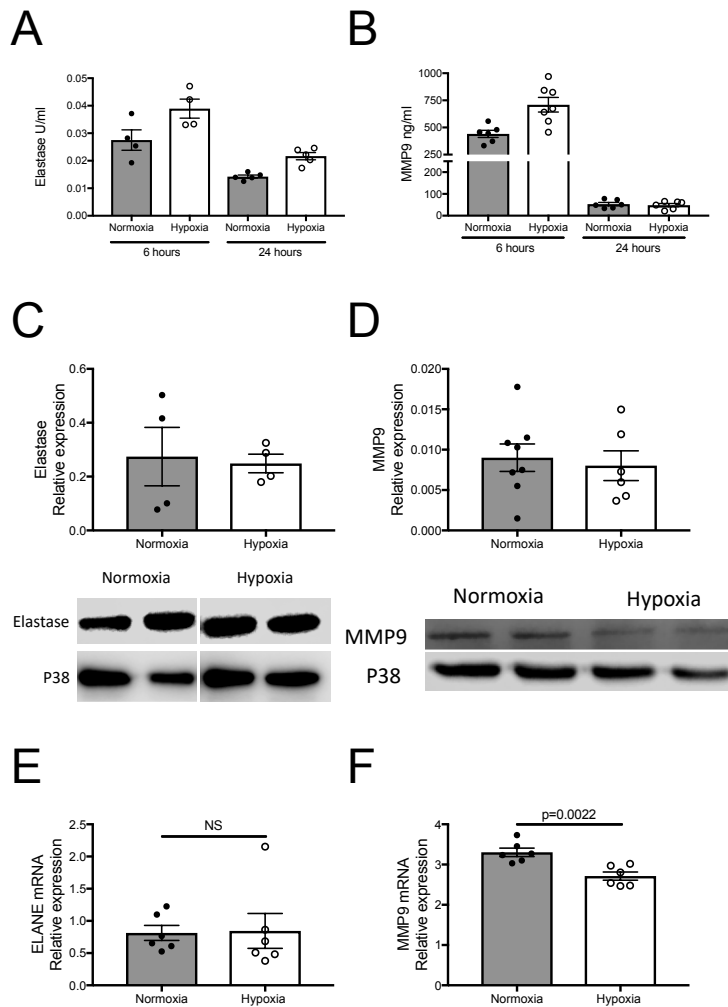

**Figure S3:**

(A) Elastase activity (n=4-5 over two experiments) and (B) MMP-9 concentrations (n=6-7 over two experiments) in BAL supernatant from normoxic and hypoxic mice 6 and 24 hours post-LPS. Intracellular expression of Elastase and MMP-9 protein was analysed by western blot (C)&(D), representative blots (including p38 loading control) shown, n $\geq$ 4 over two to three experiments. Levels of Elastase (E) and MMP9 (F) transcript were measured by RT-PCR (data shown relative to  $\beta$ -actin gene expression), n=5-6 over two experiments. (C)-(F) all represent data from highly pure BAL neutrophils isolated from mice 24 hours post-LPS, housed in either normoxia or hypoxia. All data analysed by Mann-Whitney test of significance and represents individual values and mean  $\pm$  SEM.

Figure S4

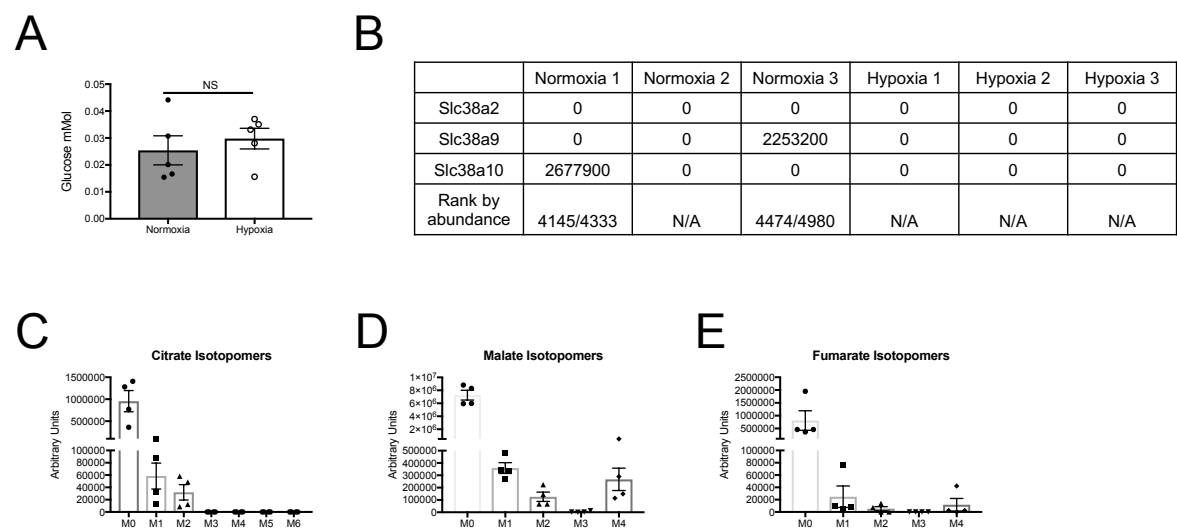

Figure S4:

(A) BAL supernatant glucose concentration from normoxic and hypoxic mice, 24 hours post-LPS, n=5 over 2 experiments, Mann-Whitney test of significance. (B) Expression of SLC38 family of glutamine transporters in the BAL neutrophil proteome (LFQ and rank shown). (C)-(E) Breakdown of isotopomers identified in neutrophils cultured with  $^{13}\text{C}_5$  Glutamine labelled HEK cell lysates (summarised in Fig 5B-D).

Figure S5

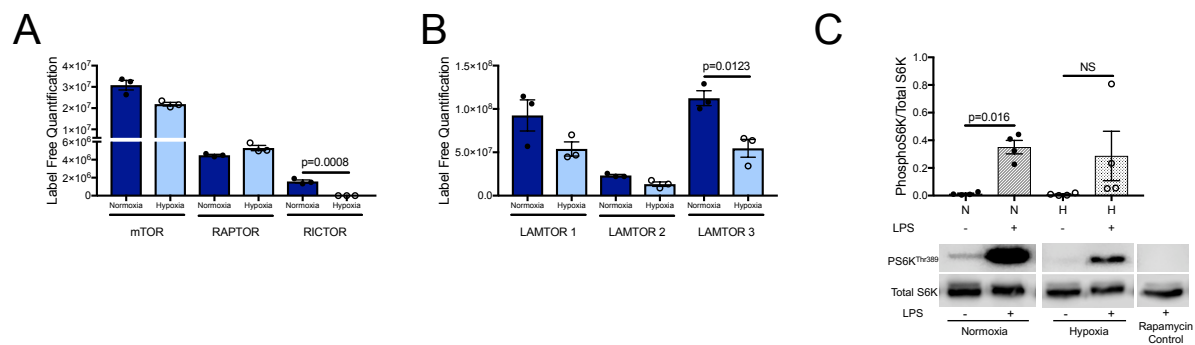

Figure S5:

Label free quantification of (A) mTORC components and (B) LAMTOR proteins involved in localising mTORC to the lysosome in highly pure BAL neutrophils from normoxic and hypoxic mice 24 hours post-nebulised LPS, n=3. (C) Ratio of phosphorylated to total S6K measured by western blot in unstimulated and LPS treated human peripheral blood neutrophils cultured in normoxia or hypoxia, representative blot shown including rapamycin control (n=4 over two experiments).

**Table S1.**

| <b>KEGG Pathway Term</b>                    | <b>Count</b> | <b>P Value</b> | <b>Fold Enrichment</b> |
|---------------------------------------------|--------------|----------------|------------------------|
| Pentose phosphate pathway                   | 27           | 1.9E-08        | 2.463                  |
| Amino sugar and nucleotide sugar metabolism | 44           | 1.3E-13        | 2.457                  |
| Fructose and mannose metabolism             | 29           | 5.3E-08        | 2.334                  |
| Citrate cycle (TCA cycle)                   | 27           | 2.7E-07        | 2.309                  |
| Galactose metabolism                        | 25           | 1.0E-05        | 2.138                  |
| Pentose and glucuronate interconversions    | 28           | 2.8E-06        | 2.128                  |
| Propanoate metabolism                       | 21           | 7.9E-05        | 2.128                  |
| Carbon metabolism                           | 90           | 5.7E-19        | 2.123                  |
| mTOR signaling pathway                      | 45           | 2.7E-09        | 2.087                  |
| Biosynthesis of amino acids                 | 56           | 9.4E-10        | 1.965                  |
| Pyruvate metabolism                         | 28           | 3.3E-05        | 1.965                  |
| Fatty acid metabolism                       | 35           | 1.1E-05        | 1.878                  |
| Insulin signaling pathway                   | 90           | 5.2E-11        | 1.759                  |
| Glutathione metabolism                      | 35           | 1.2E-04        | 1.741                  |
| Biosynthesis of unsaturated fatty acids     | 17           | 1.3E-02        | 1.723                  |
| Glucagon signaling pathway                  | 62           | 4.9E-07        | 1.697                  |
| Cysteine and methionine metabolism          | 24           | 5.4E-03        | 1.642                  |
| Starch and sucrose metabolism               | 19           | 1.8E-02        | 1.625                  |
| AMPK signaling pathway                      | 75           | 4.2E-07        | 1.616                  |
| Oxidative phosphorylation                   | 76           | 1.8E-05        | 1.496                  |

**Table S2.**

| <b>KEGG Pathway Term</b>               | <b>Count</b> | <b>P Value</b> | <b>Fold Enrichment</b> |
|----------------------------------------|--------------|----------------|------------------------|
| Fc gamma R-mediated phagocytosis       | 65           | 1.1E-13        | 2.118                  |
| Bacterial invasion of epithelial cells | 56           | 9.4E-10        | 1.965                  |
| Lysosome                               | 87           | 1.7E-14        | 1.952                  |
| NOD-like receptor signaling pathway    | 39           | 1.8E-06        | 1.906                  |
| VEGF signaling pathway                 | 41           | 1.9E-06        | 1.870                  |
| Endocytosis                            | 185          | 1.2E-24        | 1.821                  |
| Phagosome                              | 105          | 2.6E-10        | 1.651                  |
| TNF signaling pathway                  | 63           | 1.1E-05        | 1.582                  |
| Toll-like receptor signaling pathway   | 56           | 1.7E-04        | 1.517                  |
| HIF-1 signaling pathway                | 57           | 2.2E-04        | 1.500                  |
| NF-kappa B signaling pathway           | 49           | 5.8E-03        | 1.382                  |
| Antigen processing and presentation    | 41           | 1.5E-02        | 1.368                  |
| MAPK signaling pathway                 | 124          | 4.2E-05        | 1.341                  |
| Chemokine signaling pathway            | 89           | 9.0E-03        | 1.243                  |
| Focal adhesion                         | 90           | 3.1E-02        | 1.190                  |

**5 Table S3.**

| <b>KEGG Pathway</b>                         | <b>Count</b> | <b>P Value</b> | <b>Fold Enrichment</b> |
|---------------------------------------------|--------------|----------------|------------------------|
| Spliceosome                                 | 125          | 5.3E-44        | 2.57200961             |
| RNA transport                               | 126          | 2.9E-23        | 2.02831703             |
| Protein processing in endoplasmic reticulum | 116          | 1.6E-17        | 1.88956972             |
| Ribosome                                    | 85           | 1.0E-07        | 1.60422447             |



Tables S1-S3

**Neutrophils show enrichment for metabolic, inflammatory and biosynthetic pathways.**

The genes encoding the 5398 proteins identified in the neutrophil proteome were compared  
5 with the whole mouse genome using DAVID software to identify pathway enrichment.

Enriched KEGG pathway terms with their corresponding gene counts, significance and fold  
enrichment are shown. Table one shows selected metabolic pathways, table two shows  
selected metabolic pathways and table three shows selected biosynthetic pathways.

**Table S4.**

| <b>Protein names</b>                                 | <b>Gene names</b> | <b>Fold change</b> | <b>P value</b> |
|------------------------------------------------------|-------------------|--------------------|----------------|
| Phosphatidylinositol-glycan-specific phospholipase D | Gpld1             | 7.8093             | 0.0004         |
| V-type proton ATPase 116 kDa subunit a isoform 2     | Atp6v0a2          | 1.9209             | 0.0085         |
| Epididymal secretory protein E1                      | Npc2              | 1.9188             | 0.0171         |
| Solute carrier family 15 member 3                    | Slc15a3           | 1.8297             | 0.0019         |
| CSC1-like protein 1                                  | Tmem63a           | 1.6388             | 0.0100         |
| Arylsulfatase B                                      | Arsb              | 1.6018             | 0.0021         |
| Sortilin                                             | Sort1             | 1.5990             | 0.0133         |
| N-acetylgalactosamine-6-sulfatase                    | Galns             | 1.5236             | 0.0093         |
| Di-N-acetylchitobiase                                | Ctbs              | 1.4789             | 0.0076         |
| Beta-hexosaminidase subunit beta                     | Hexb              | 1.4192             | 0.0001         |
| Sphingosine kinase 2                                 | Sphk2             | 1.4077             | 0.0093         |
| Beta-hexosaminidase subunit alpha                    | Hexa              | 1.3850             | 0.0028         |
| Beta-mannosidase                                     | Manba             | 1.3549             | 0.0052         |
| Adenosine deaminase                                  | Ada               | 1.3432             | 0.0010         |
| Annexin A6                                           | Anxa6             | 0.6900             | 0.0011         |
| Serum paraoxonase/arylesterase 2                     | Pon2              | 0.6839             | 0.0064         |
| V-type proton ATPase subunit d 1                     | Atp6v0d1          | 0.6362             | 0.0119         |
| Enhancer of mRNA-decapping protein 3                 | Ede3              | 0.6235             | 0.0185         |
| N-acyl ethanolamine-hydrolyzing acid amidase         | Naaa              | 0.6145             | 0.0190         |
| Guanine nucleotide-binding protein subunit beta-1    | Gnb1              | 0.6101             | 0.0120         |

**Table S4: Upregulation of the lysosome in hypoxic neutrophils**

- 5 Significantly up- and down-regulated lysosomal proteins as detailed in Figure 6B.

Significantly upregulated proteins are in green and down regulated in red, n=3, significance

defined as  $p < 0.05$ ,  $S_0 = 0.1$ . Corrected for multiple hypothesis testing using permutation-based FDR=0.05, p value and fold change shown.

**Data files:** Table S5 is included as a separate Microsoft Excel File

**Table S6: Flow cytometry antibodies**Lung Digest Flow Cytometry Antibody Panel

| Antigen | Fluorophore | Concentration in mastermix | Source    | Product code |
|---------|-------------|----------------------------|-----------|--------------|
| CD11b   | BV 421      | 1:400                      | Biolegend | 101235       |
| Ly6C    | FITC        | 1:200                      | Biolegend | 128005       |
| Ly6G    | PE          | 1:200                      | Biolegend | 127607       |
| SiglecF | PE CF594    | 1:800                      | BD        | 562757       |
| CD64    | APC         | 1:200                      | Biolegend | 139305       |
| CD45    | AF 700      | 1:200                      | Biolegend | 103128       |

Mouse Whole Blood Flow Cytometry Antibody Panel

| Antigen | Fluorophore | Concentration in mastermix | Source    | Product code |
|---------|-------------|----------------------------|-----------|--------------|
| Ly6G    | V450        | 1:200                      | Biolegend | 127612       |
| CD3     | PE          | 1:200                      | Biolegend | 100205       |
| CD19    | PE          | 1:200                      | Biolegend | 152407       |
| SiglecF | PE CF594    | 1:800                      | BD        | 562757       |
| CD115   | APC         | 1:200                      | Biolegend | 135510       |
| CD45    | AF 700      | 1:200                      | Biolegend | 103128       |
| CD11B   | APC Cy7     | 1:200                      | Biolegend | 101225       |
| CD62L   | PE Cy7      | 1:200                      | Biolegend | 104417       |

5

Additional Flow Cytometry Antibodies

| Antigen | Fluorophore | Concentration in mastermix | Source     | Product code |
|---------|-------------|----------------------------|------------|--------------|
| CSF2Ra  | APC         | 7.5µl per test             | Bio-techne | FAB6130A     |
| CSF2Rb  | PE          | 5µl per test               | Bio-techne | FAB5492P     |
| TNFRSF1 | APC         | 1:100                      | Biolegend  | 113005       |
| TNFRSF2 | PE          | 1:100                      | Biolegend  | 113405       |
